# Supplementary material for: Corticomuscular interactions during different movement periods in a multi-joint compound movement
Source: PubMed Central journal article supplement (PMC7081206; doi:10.1038/s41598-020-61909-z), 2020-03-19

1 **Corticomuscular interactions during different movement periods in**  
2 **a multi-joint compound movement**

3

4 Rouven Kenville<sup>1,2</sup>, Tom Maudrich<sup>1,2</sup>, Carmen Vidaurre<sup>5,6</sup>, Dennis Maudrich<sup>2</sup>, Arno  
5 Villringer<sup>2,7,8</sup>, Vadim V. Nikulin<sup>2,3,4\*§</sup>, Patrick Ragert<sup>1,2§</sup>

6

7 <sup>1</sup>Institute for General Kinesiology and Exercise Science, Faculty of Sports Science,  
8 University of Leipzig, D-04109 Leipzig, Germany

9 <sup>2</sup>Max Planck Institute for Human Cognitive and Brain Sciences, Department of  
10 Neurology, D-04103 Leipzig, Germany

11 <sup>3</sup>Centre for Cognition and Decision Making, National Research University Higher  
12 School of Economics, Moscow, 101000, Russian Federation

13 <sup>4</sup>Neurophysics Group, Department of Neurology, Charité-University Medicine Berlin,  
14 Campus Benjamin Franklin, Berlin, 10117, Germany

15 <sup>5</sup>Dpt. of Statistics, Informatics and Mathematics, Public University of Navarre,  
16 Pamplona 31006, Spain

17 <sup>6</sup>Machine Learning Group, Faculty of EE and Computer Science, TU Berlin, Berlin  
18 10587, Germany

19 <sup>7</sup>MindBrainBody Institute at Berlin School of Mind and Brain, Charité-  
20 Universitätsmedizin Berlin and Humboldt-Universität zu Berlin, 10099, Germany

21 <sup>8</sup>Clinic for Cognitive Neurology, University Hospital Leipzig, D-04103 Leipzig, Germany

22 § contributed equally

23

24 \*Correspondence:

25 Rouven Kenville, Max Planck Institute for Human Cognitive and Brain Sciences,  
26 Department of Neurology, D-04103 Leipzig, Germany, Phone: +49 341 9940-2407,  
27 Email: [kenville@cbs.mpg.de](mailto:kenville@cbs.mpg.de)

28

29 **Supplementary section**

30 **Figure S1 - CMC spectra overview.** Illustrated are grand-averaged CMC spectra with  
31 individual CMC spectra indicated through transparent lines. Only CMC values deemed  
32 significant after permutation are illustrated. Columns represent movement periods:  
33 ECC (blue), ISO (red) and CON (gray), rows indicate muscles.

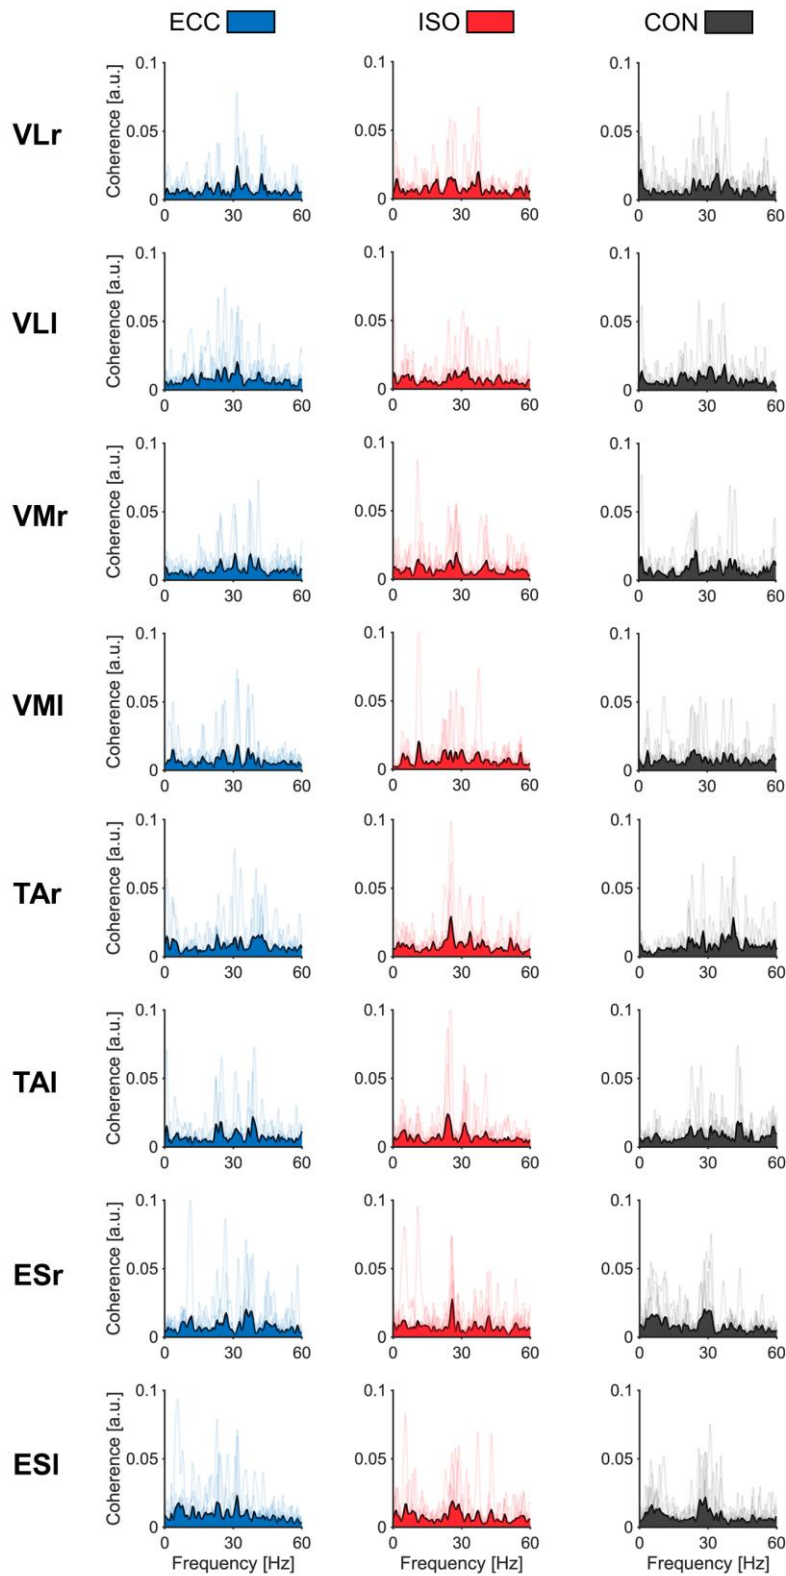

35 **Figure S2 - Source - localization of simulated data. (A)** Scalp topography and **(B)**  
36 corresponding source-localization results of simulated EEG sources located in the  
37 visual cortex coupled with an EMG source. Electrode positions correspond to those  
38 used during all measurements. We used EEGLAB<sup>83</sup> to create scalp plots in section  
39 **(A)** and the MATLAB toolbox METH by Guido Nolte  
40 ([https://www.uke.de/english/departments-institutes/institutes/neurophysiology-and-](https://www.uke.de/english/departments-institutes/institutes/neurophysiology-and-pathophysiology/research/research-groups/index.html)  
41 [pathophysiology/research/research-groups/index.html](https://www.uke.de/english/departments-institutes/institutes/neurophysiology-and-pathophysiology/research/research-groups/index.html)) to illustrate source localization  
42 results in section **(B)**.

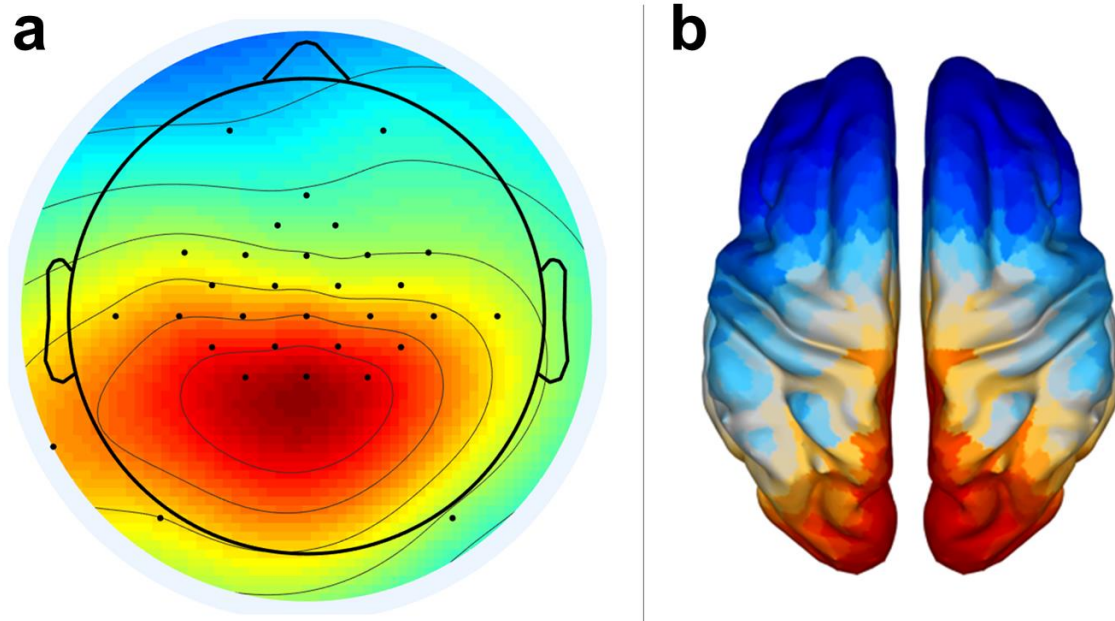

43

44

45 **Figure S3 - Overview of EMG activity per muscle and period.** EMG bursts (40 per period) were averaged across muscles, epochs  
46 and participants. Each column represents different movement periods: ECC (blue), ISO (red) and CON (gray). Each row represents  
47 distinct muscles with labels next to each burst. Please note different scaling between muscles.  
48

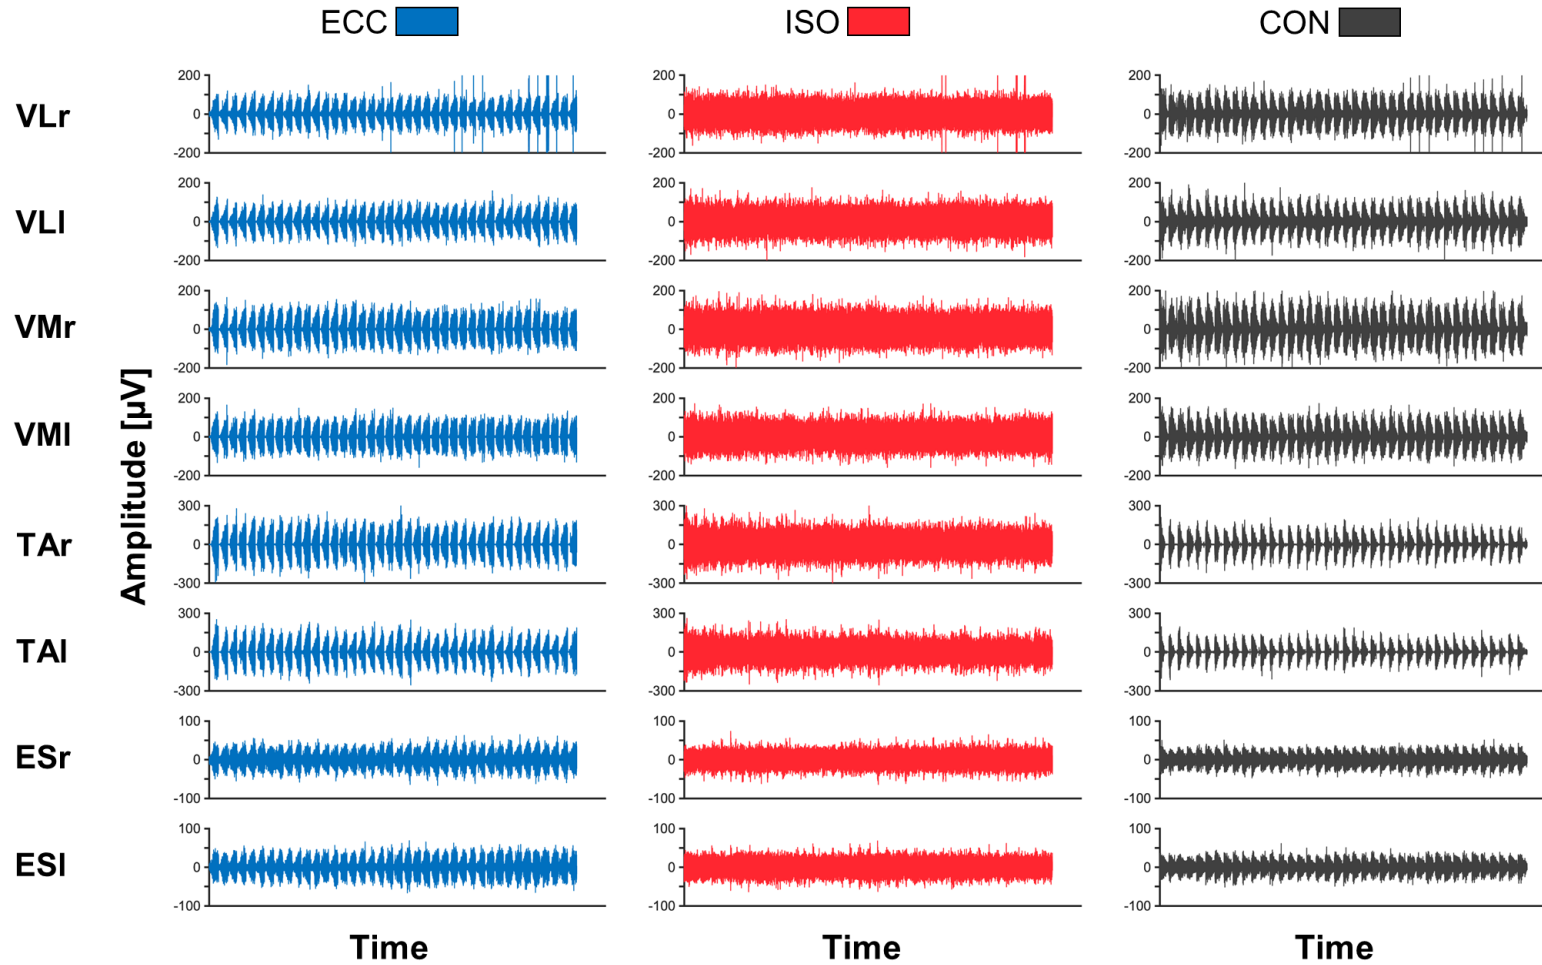

Supplement: 41598_2020_61909_MOESM1_ESM.pdf [file 41598_2020_61909_MOESM1_ESM.pdf]
